# Supplementary material for: Preparing dangling bonds by nanoholes on graphene oxide nanosheets and their enhanced magnetism
Source: Royal Society of Chemistry journal article supplement (doi:10.1039/d0ra05945e), 2020-01-01
Supplement: d0ra05945e1.pdf [file d0ra05945e1.pdf]

## Supporting Information

# **Preparing Dangling Bonds by Nanoholes on Graphene Oxide Nanosheets and Their Enhanced Magnetism**

Juan Li,<sup>‡</sup> Rongli Cui,<sup>‡</sup> Yanan Chang, Huan Huang, Xihong Guo, Jiahao Wang, Ru Liu,  
Kui Chen, Jianglong Kong, Gengmei Xing\* and Baoyun Sun\*

<sup>‡</sup> These authors contributed equally to this work

CAS Key Laboratory for Biomedical Effects of Nanomaterial & Nanosafety, Institute  
of High Energy Physics, Chinese Academy of Science (CAS), Beijing 100049, China

Address correspondence to Baoyun Sun, [sunby@ihep.ac.cn](mailto:sunby@ihep.ac.cn) ; Gengmei Xing,

[xinggm@ihep.ac.cn](mailto:xinggm@ihep.ac.cn)

Table S1. The contents of the selected metal impurity elements in the GO, LHGO, and MHGO samples measured by ICP-MS.

| Samples | Mn(ppm) | Fe(ppm) | Co(ppm) | Ni(ppm) |
|---------|---------|---------|---------|---------|
| GO      | 3.66    | 44.86   | 0.03    | 0.93    |
| LHGO    | 4.13    | 47.51   | 0.04    | 0.44    |
| MHGO    | 4.64    | 63.94   | 0.05    | 0.99    |

Because the paramagnetic or ferromagnetic (FM) response of graphene which was induced by dangling bonds, defects and/or functionalization are of several orders of magnitude lower compared to that of  $3d$  transition metals, e.g. iron, cobalt, nickel and manganese, ICP-MS was employed to quantify the contents of  $3d$  metal impurities and exclude their effect on magnetic properties of as-prepared GO, LHGO, and MHGO. The total concentration of Fe, Co, Ni and Mn in GO, LHGO, and MHGO samples was below 70ppm (Table S1). The increase of magnetic impurity of HGO may be ascribed to the weight loss from the functional groups. Considering the measured concentrations and magnetic moments of the metal impurities, the total  $\chi_{\text{mass}}$  of Fe, Co, Ni and Mn was estimated to 2 orders smaller than as-prepared GO, SGO, and DGO in a 1 kOe field (Fig. 3, 4). The contribution of Fe, Co, Ni and Mn to the samples'  $\chi_{\text{mass}}$  was assumed to be negligible.<sup>20</sup> Undoubtedly the magnetism comes from the intrinsic properties of graphene.<sup>24-26</sup>
